# Supplementary material
Source: PubMed Central journal article supplement (PMC7308061)
Supplement: jciinsight-5-137686-s221.pdf [file jciinsight-5-137686-s221.pdf]

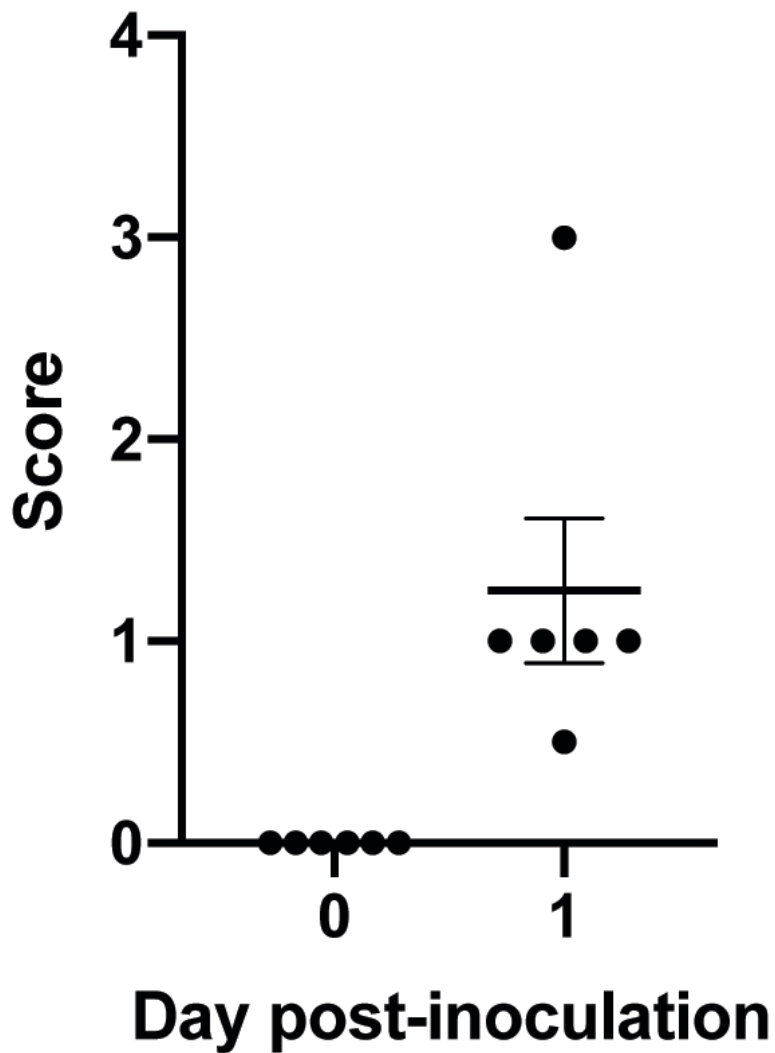

**Supplemental Figure 1.** Pharyngitis score for nonhuman primates before (day 0) and after (day 1) infection with the M1 GAS input transposon insertion mutant library. Pharyngitis was scored as mild erythema with hyperemic blood vessels (+1), more intense erythema and palatal petechiae (+2), and intense erythema with palatal petechiae and exudative tonsillitis (+3).
